# Supplementary material for: Toxicity of Pine Monoterpenes to Mountain Pine Beetle
Source: PubMed Central journal article supplement (PMC5562797; doi:10.1038/s41598-017-08983-y), 2017-08-18
Supplement: 41598_2017_8983_MOESM1_ESM.pdf [file 41598_2017_8983_MOESM1_ESM.pdf]

## **SUPPLEMENTARY INFORMATION**

### **Toxicity of Pine Monoterpenes to Mountain Pine Beetle**

Christine C. Chiu<sup>1,2</sup>, Christopher I. Keeling<sup>1,3</sup>, Joerg Bohlmann<sup>1,2,\*</sup>

<sup>1</sup>Michael Smith Laboratories, University of British Columbia, 2185 East Mall, Vancouver, B.C., Canada, V6T 1Z4

<sup>2</sup>Botany Department, University of British Columbia, 6270 University Blvd, Vancouver, B.C., V6T 1Z4

<sup>3</sup>Present address: Department of Biological Sciences, Simon Fraser University, 8888 University Drive, Burnaby, B.C., Canada, V5A 1S6

\*corresponding author: E-mail: bohlmann@mssl.ubc.ca

**Table S1.** Monoterpenes used in toxicity bioassays

| <b>Compound</b>                     | <b>CAS</b> | <b>Purity</b> | <b>Supplier</b>           | <b>Catalog #</b> | <b>Lot #</b> |
|-------------------------------------|------------|---------------|---------------------------|------------------|--------------|
| (1 <i>R</i> )-(+)- $\alpha$ -Pinene | 7785-70-8  | 98%           | Sigma Aldrich             | P45680           | 08926AE      |
| (1 <i>S</i> )-(-)- $\alpha$ -Pinene | 7785-26-4  | 99%           | Sigma Aldrich             | 274399           | 09409MS      |
| (1 <i>S</i> )-(-)- $\beta$ -Pinene  | 18172-67-3 | 99%           | Sigma Aldrich             | 112089           | 00307LG      |
| (1 <i>R</i> )-(+)- $\beta$ -Pinene  | 19902-08-0 | 98%           | Fluka                     | 80607            | BCBK2147V    |
| (1 <i>S</i> )-(+)-3-Carene          | 498-15-7   | 99%           | Sigma Aldrich             | 441619           | 0531PH       |
| Terpinolene                         | 586-62-9   | 85%           | Fluka                     | 86485            | 1401137      |
| (1 <i>S</i> )-(-)-Limonene          | 5989-54-8  | 96%           | Sigma Aldrich             | 21836-7          | 14105EU      |
| (1 <i>R</i> )-(+)-Limonene          | 5989-27-5  | ~90%          | Fluka                     | 62122            | BCBH9990V    |
| Myrcene                             | 123-35-3   | 99%           | Sigma Aldrich             | M100005          | BCBD7911V    |
| (-)- $\beta$ -Phellandrene          | 555-10-2   | 84%           | Synergy<br>Semiochemicals | Custom           | Custom       |

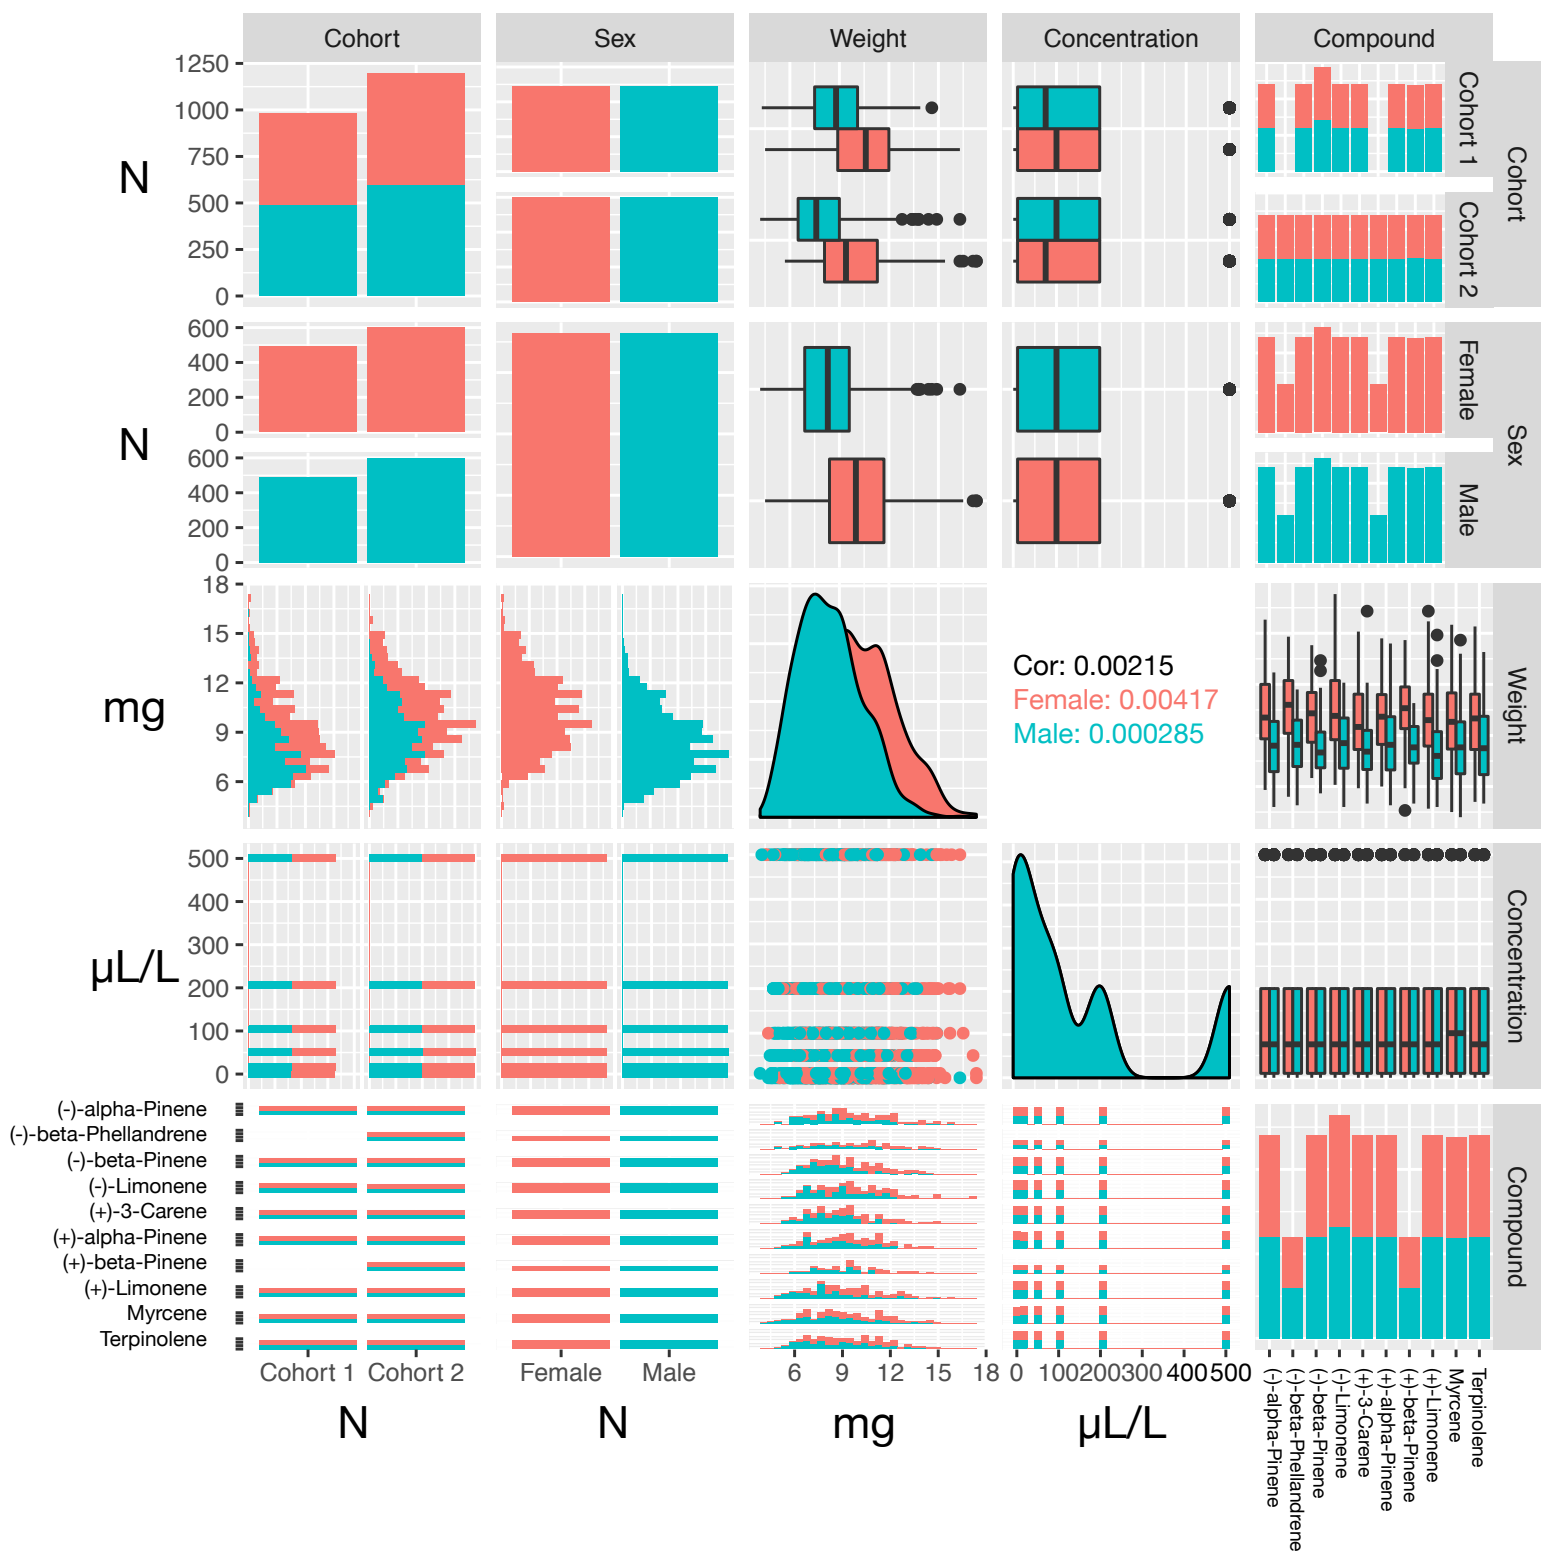

**Figure S1:** Graphical summary of the raw data.

Matrix of graphics representing the relationship of the factors *Cohort*, *Sex* (female, red; male, blue), beetle *Weight*, compound *Concentration*, and *Compound* to each other. For examples, (1) the *Weight* column x *Cohort* row graph shows the distribution of beetle weights for each sex, for each cohort; (2) the *Cohort* column x *Compound* row graph shows the number of beetles of each sex, for each cohort, and for each compound. In this graph one can see that equal numbers of beetles of each sex for each compound were tested, and that (-)-beta-phellandrene and (+)-beta-pinene were only tested with cohort 2.

**A. Cohort 1 (-)-alpha-Pinene  
Concentration-Mortality Curve**

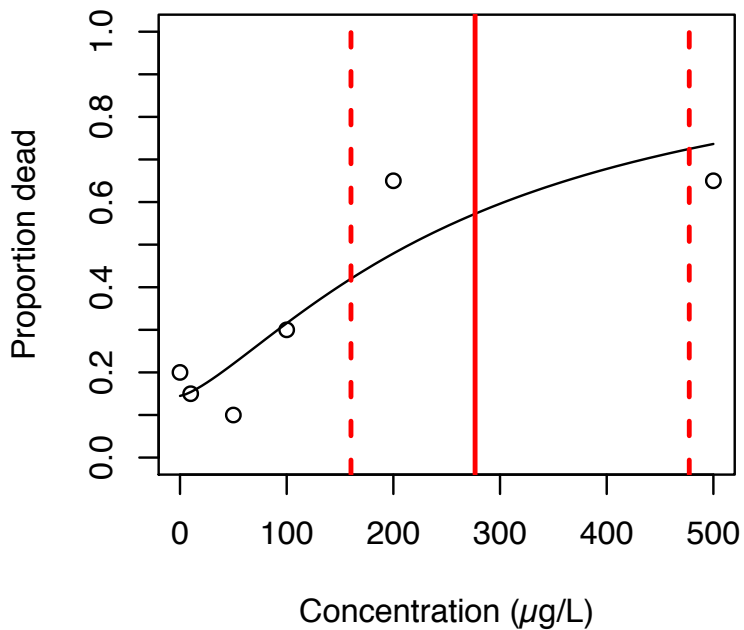

**B. Cohort 1 (-)-alpha-Pinene  
at dose LD50 = 277  $\mu\text{L/L}$**

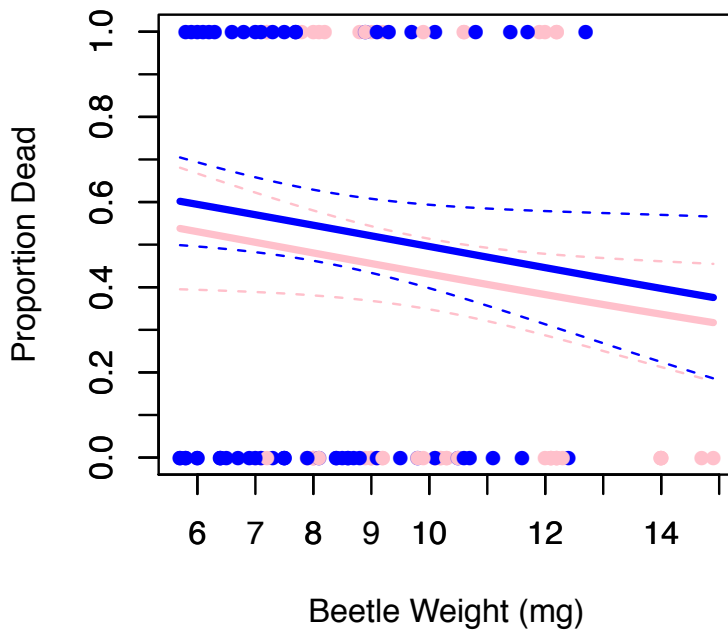

**C. Cohort 1 (-)-beta-Pinene  
Concentration-Mortality Curve**

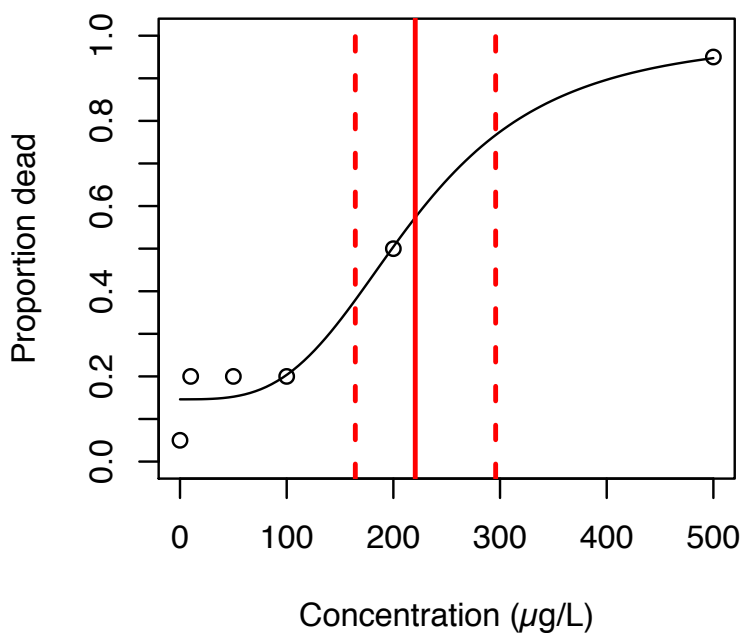

**D. Cohort 1 (-)-beta-Pinene  
at dose LD50 = 221  $\mu\text{L/L}$**

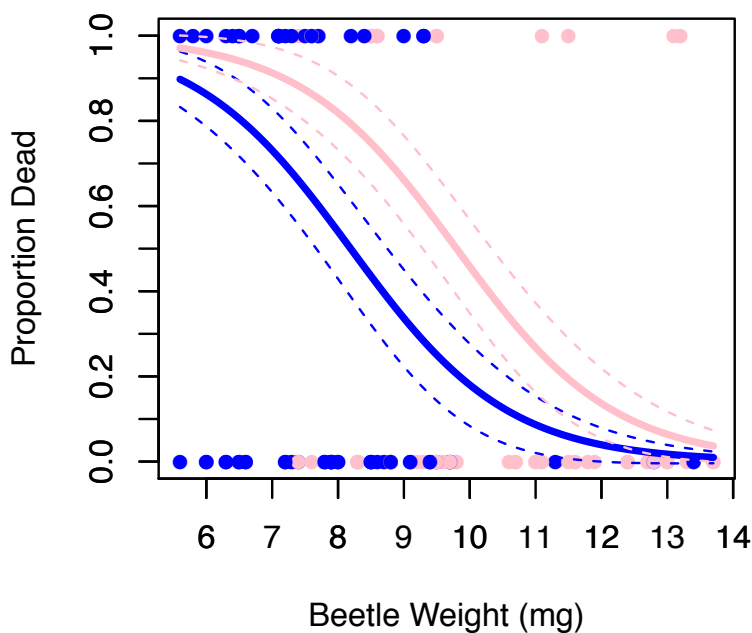

**F. Cohort 1 (-)-Limonene  
Concentration-Mortality Curve**

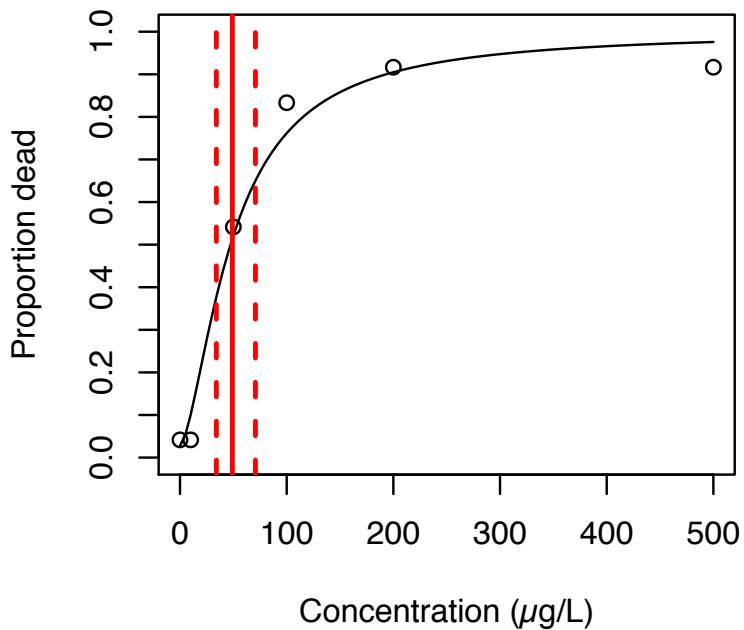

**F. Cohort 1 (-)-Limonene  
at dose  $\text{LD}_{50} = 49 \mu\text{L/L}$**

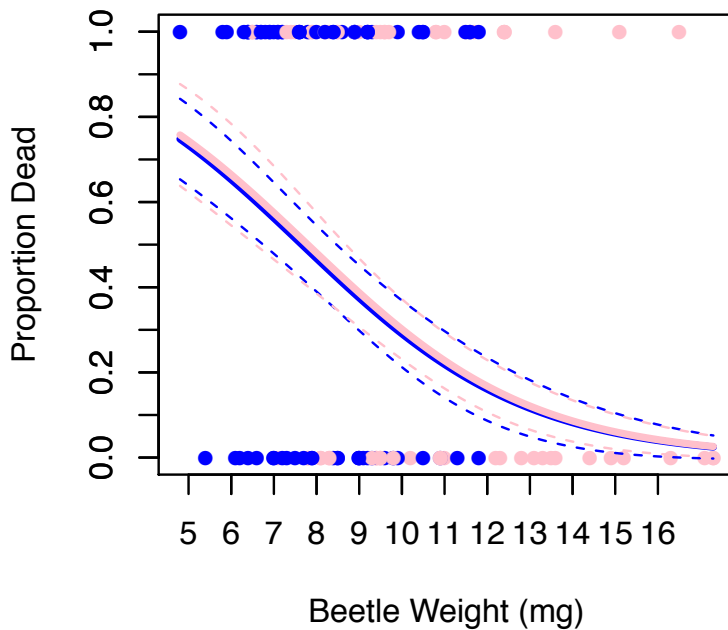

**G. Cohort 1 (+)-3-Carene  
Concentration-Mortality Curve**

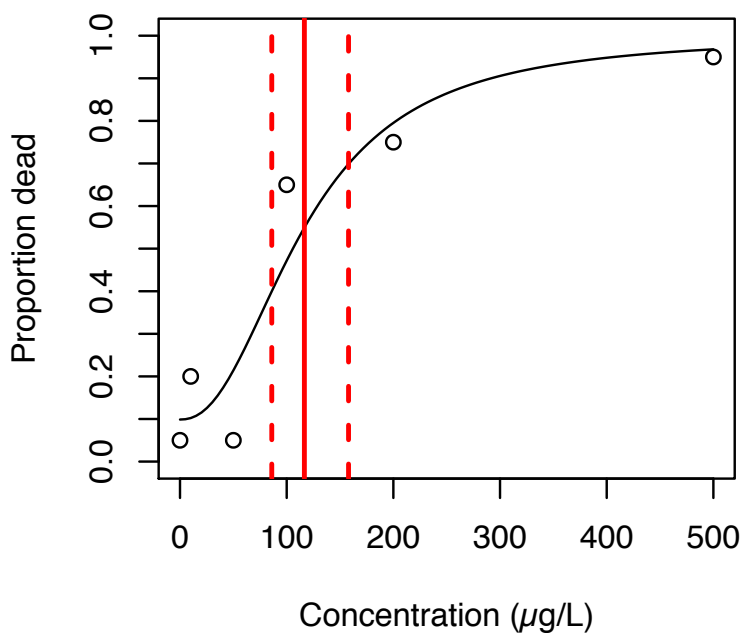

**H. Cohort 1 (+)-3-Carene  
at dose  $\text{LD}_{50} = 117 \mu\text{L/L}$**

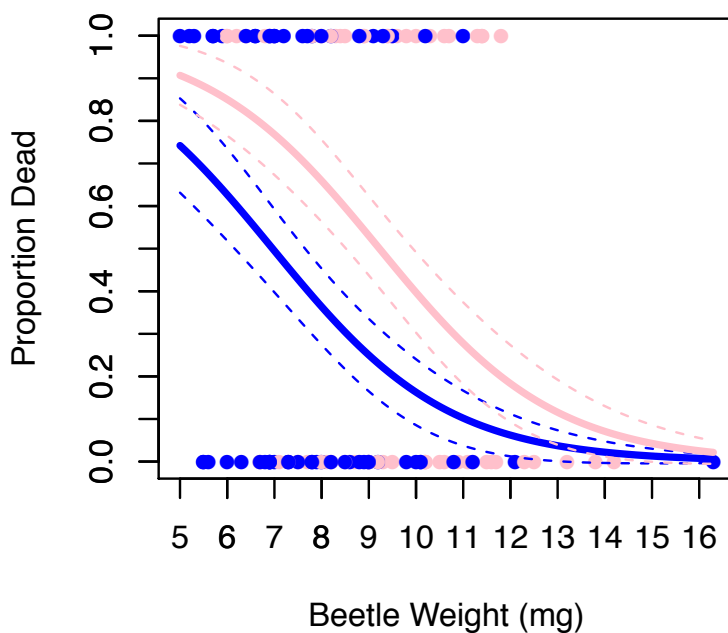

I. Cohort 1 (+)-alpha-Pinene  
Concentration-Mortality Curve

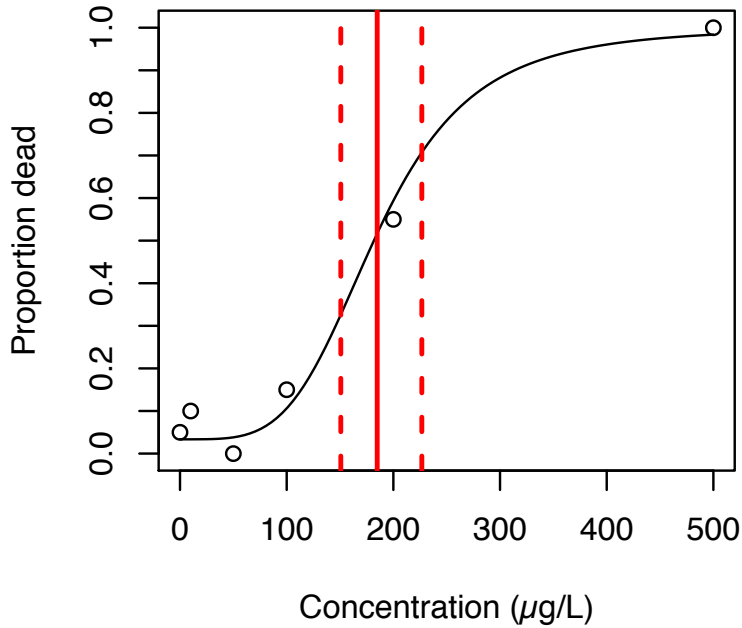

J. Cohort 1 (+)-alpha-Pinene  
at dose LD50 = 185  $\mu\text{L/L}$

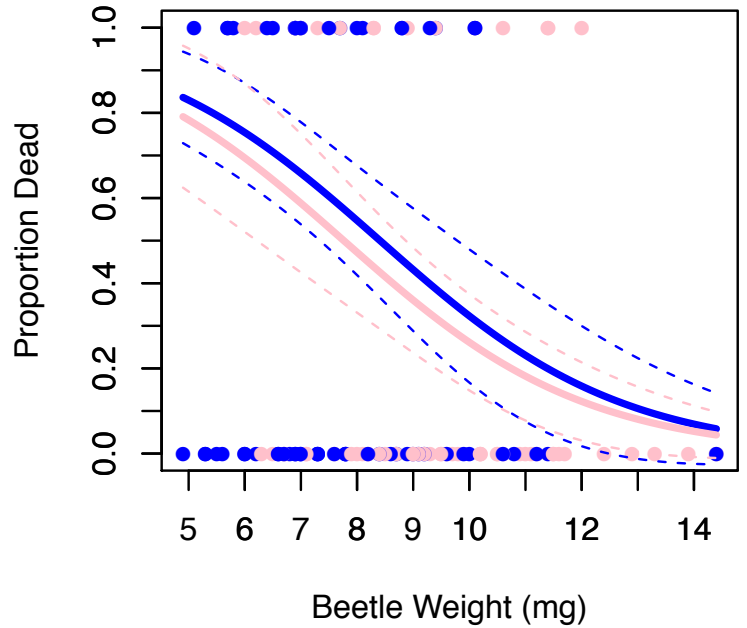

K. Cohort 1 (+)-Limonene  
Concentration-Mortality Curve

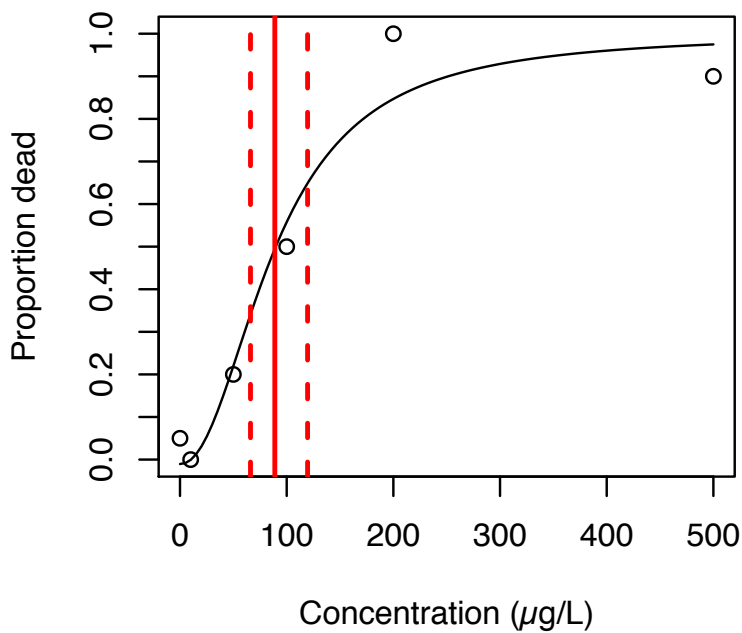

L. Cohort 1 (+)-Limonene  
at dose LD50 = 89  $\mu\text{L/L}$

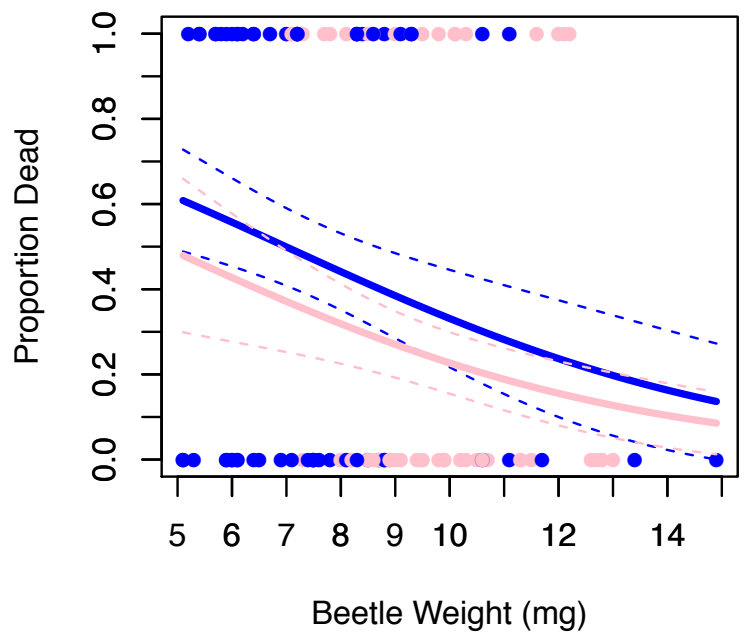

**M. Cohort 1 Myrcene  
Concentration–Mortality Curve**

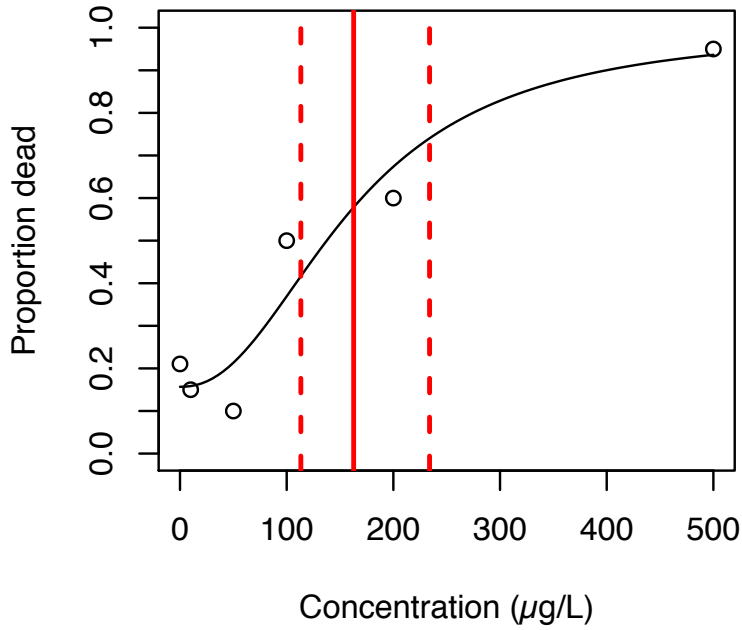

**N. Cohort 1 Myrcene  
at dose LD50 = 163  $\mu\text{L/L}$**

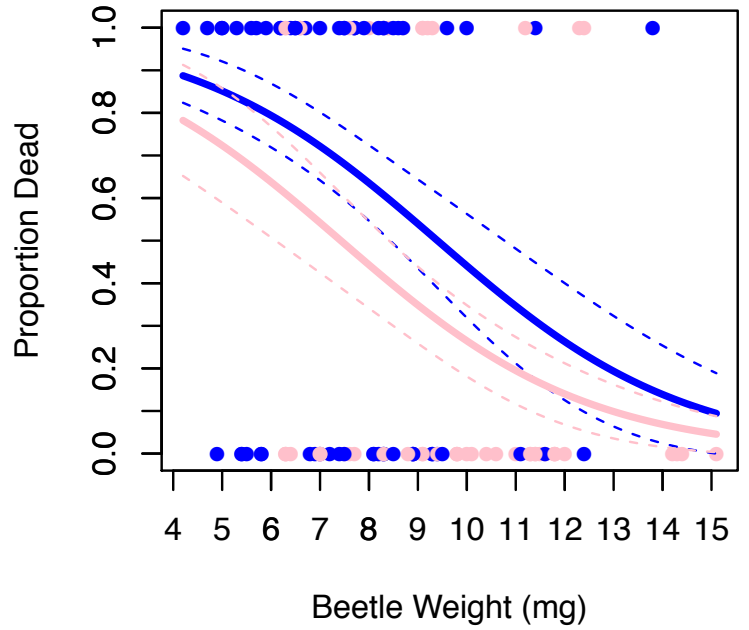

**O. Cohort 1 Terpinolene  
Concentration–Mortality Curve**

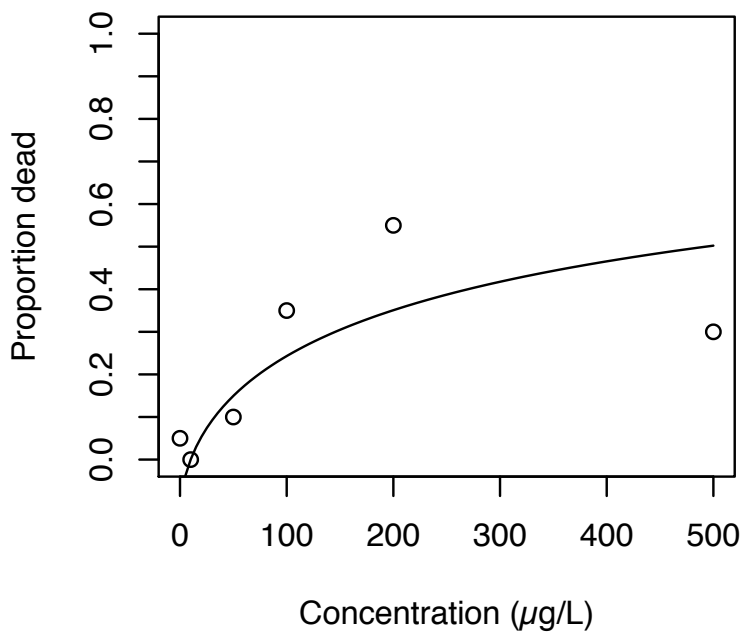

**P. Cohort 1 Terpinolene  
at dose LD50 = 340  $\mu\text{L/L}$**

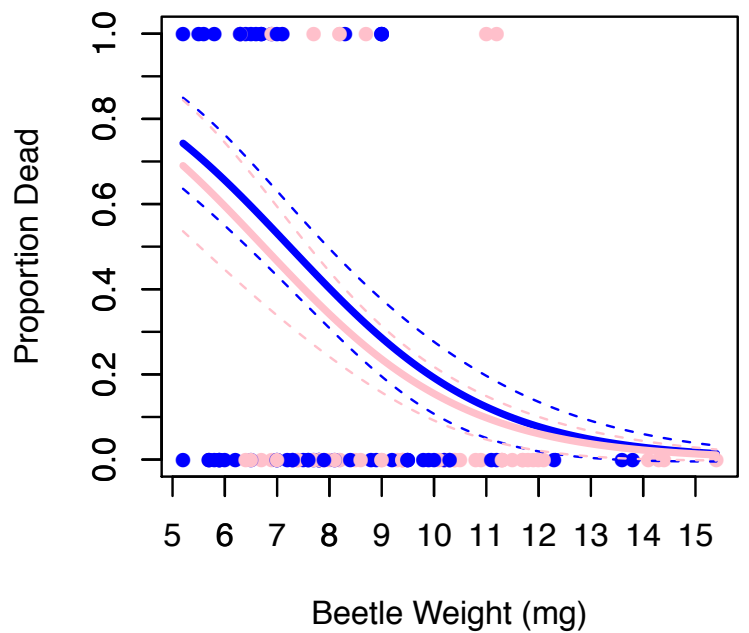



**Q. Cohort 2 (-)-alpha-Pinene  
Concentration-Mortality Curve**

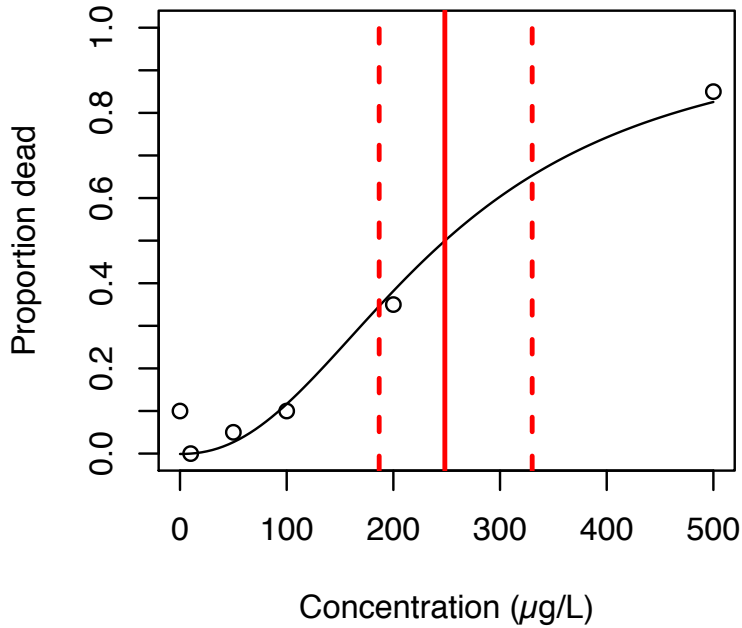

**R. Cohort 2 (-)-alpha-Pinene  
at dose LD50 = 248 µL/L**

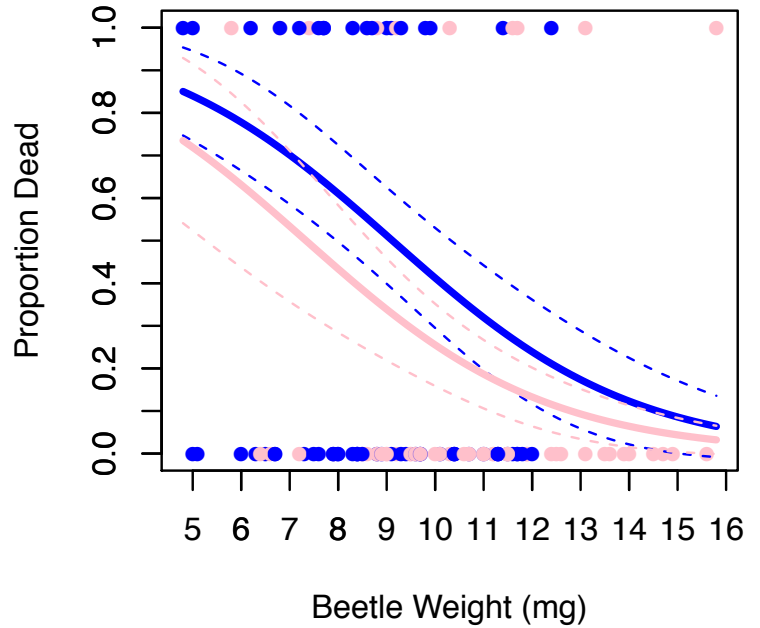

**S. Cohort 2 (-)-beta-Phellandrene  
Concentration-Mortality Curve**

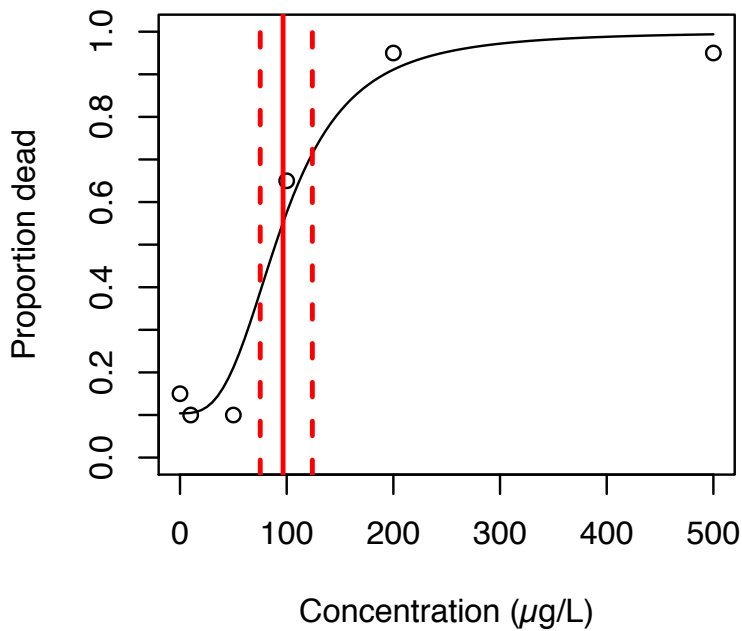

**T. Cohort 2 (-)-beta-Phellandrene  
at dose LD50 = 97 µL/L**

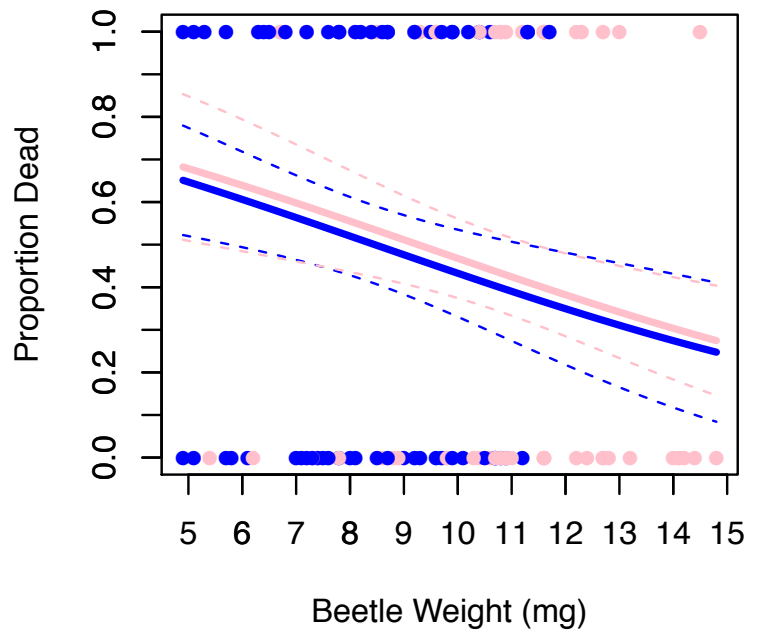

**U. Cohort 2 (-)-beta-Pinene  
Concentration-Mortality Curve**

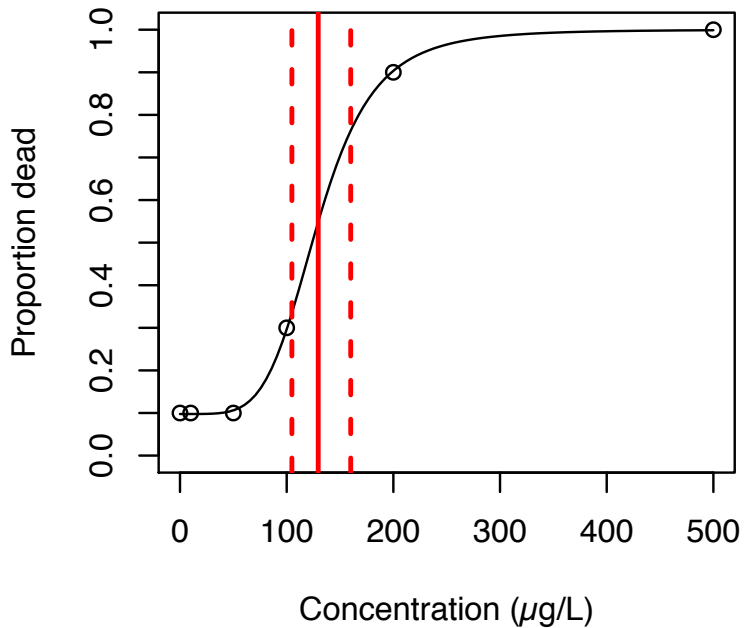

**V. Cohort 2 (-)-beta-Pinene  
at dose LD50 = 130  $\mu\text{L/L}$**

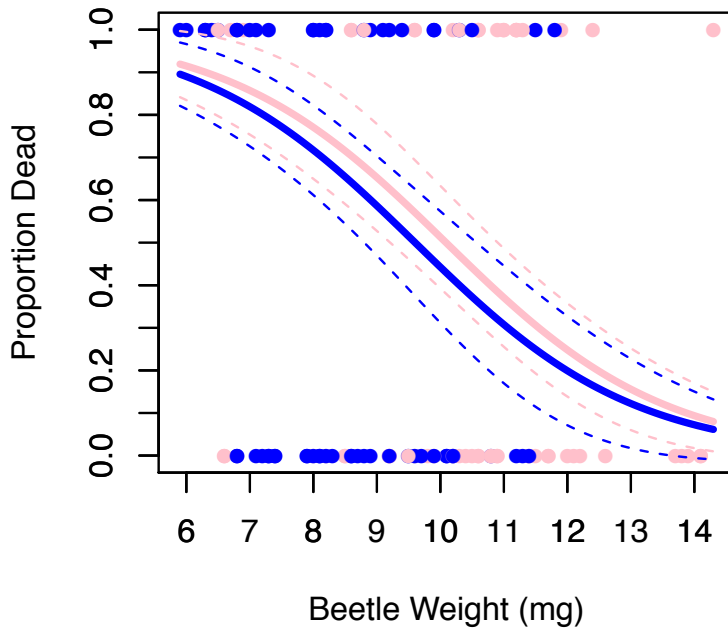

**W. Cohort 2 (-)-Limonene  
Concentration-Mortality Curve**

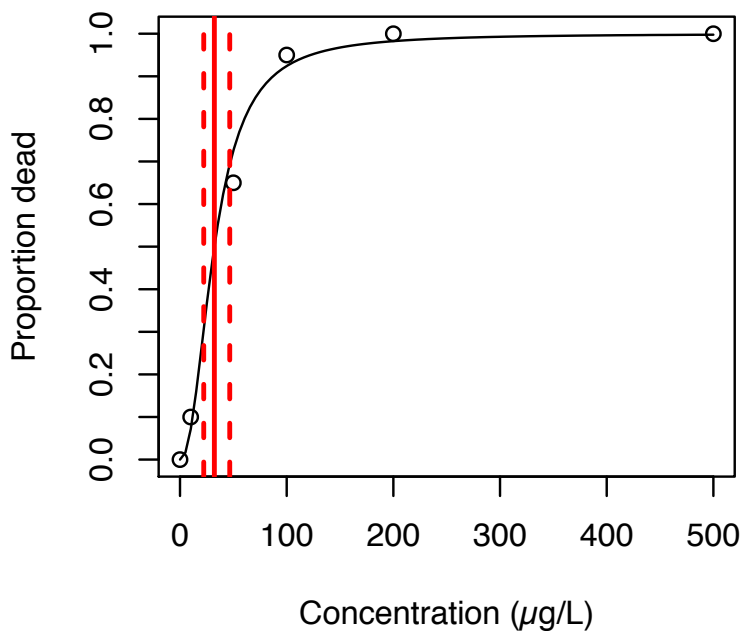

**X. Cohort 2 (-)-Limonene  
at dose LD50 = 32  $\mu\text{L/L}$**

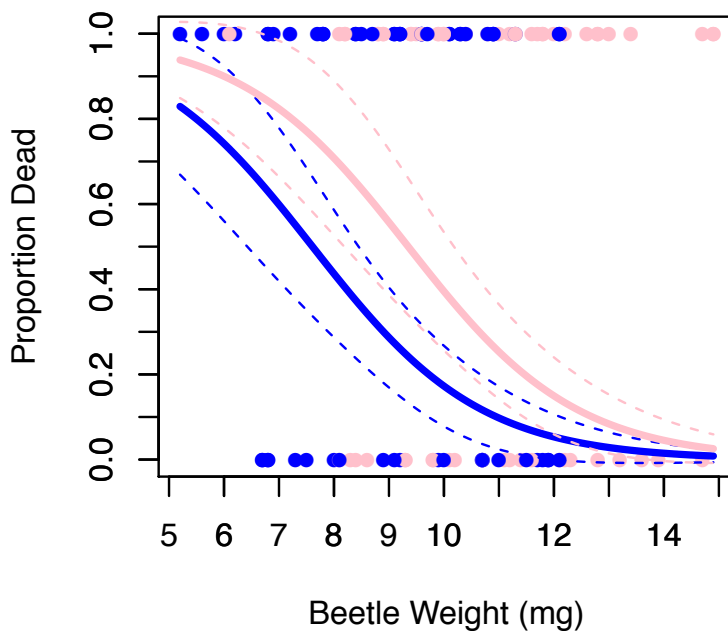

**Y.** Cohort 2 (+)-3-Carene  
Concentration-Mortality Curve

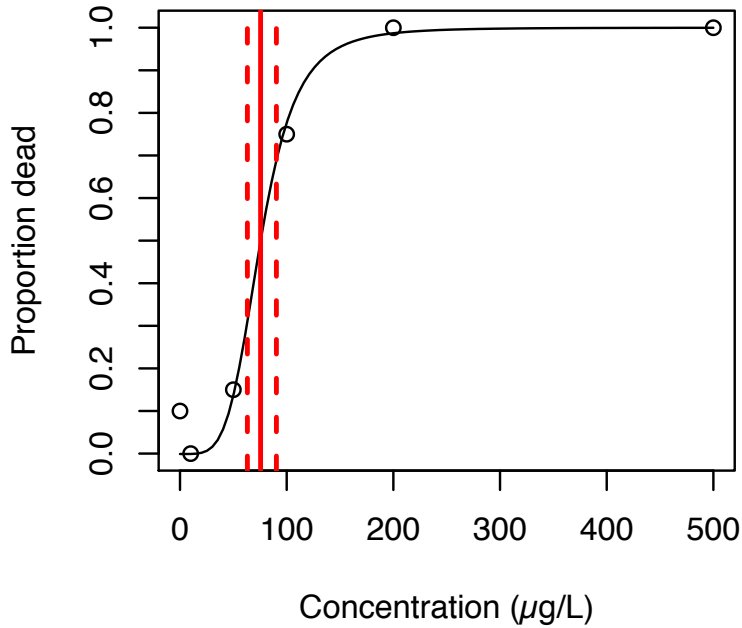

**Z.** Cohort 2 (+)-3-Carene  
at dose  $\text{LD50} = 76 \mu\text{L/L}$

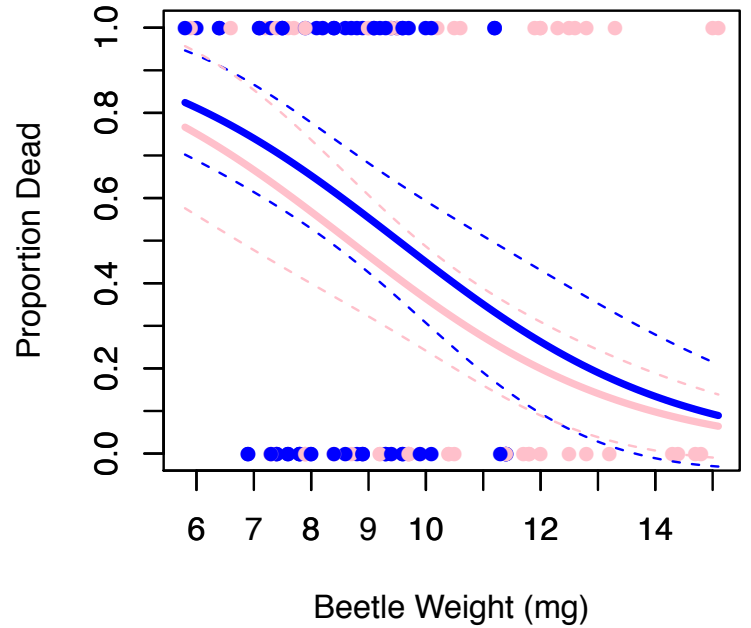

**AA.** Cohort 2 (+)-alpha-Pinene  
Concentration-Mortality Curve

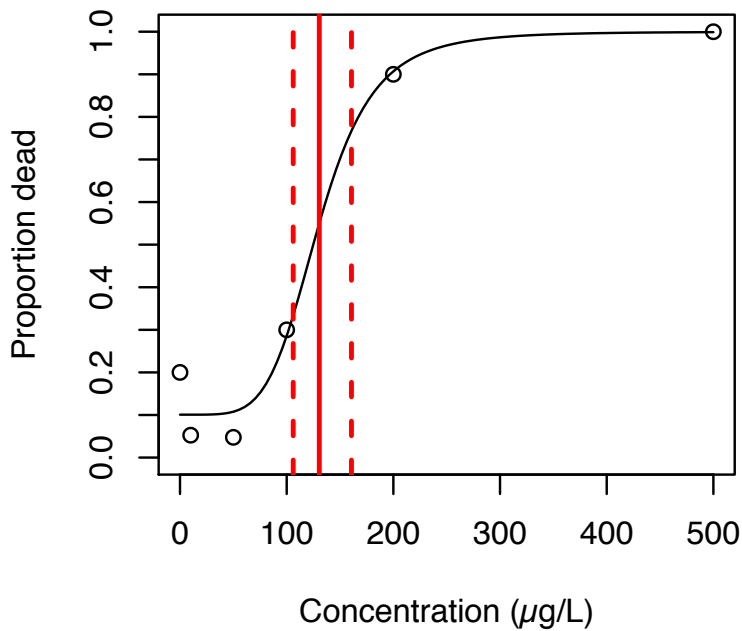

**AB.** Cohort 2 (+)-alpha-Pinene  
at dose  $\text{LD50} = 131 \mu\text{L/L}$

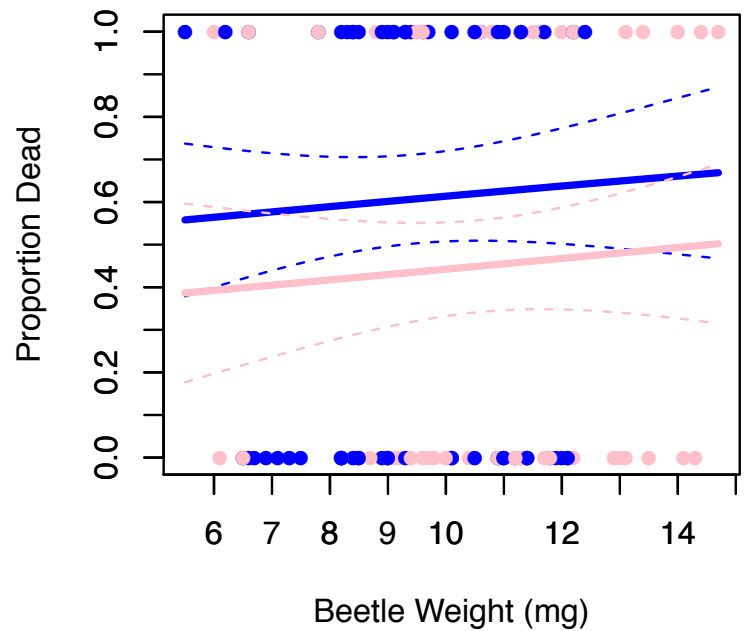

**AC. Cohort 2 (+)-beta-Pinene  
Concentration-Mortality Curve**

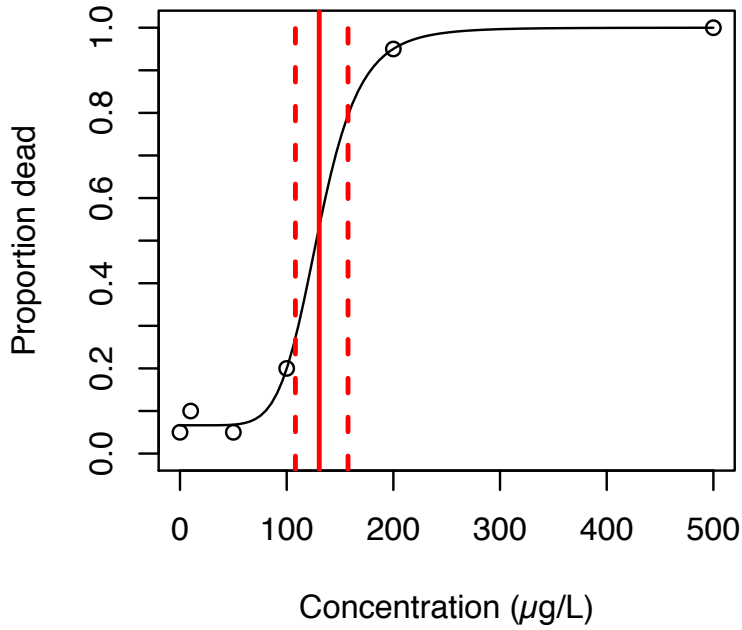

**AD. Cohort 2 (+)-beta-Pinene  
at dose LD50 = 131  $\mu\text{L/L}$**

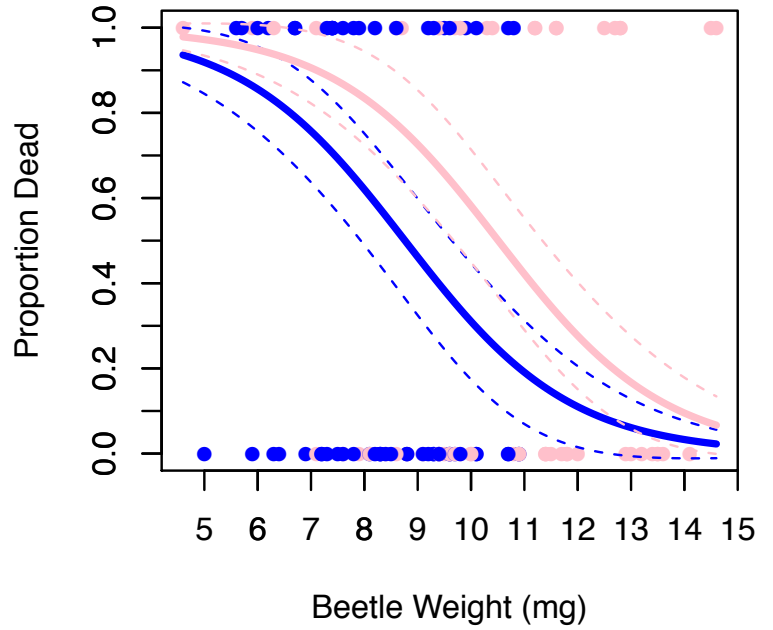

**AE. Cohort 2 (+)-Limonene  
Concentration-Mortality Curve**

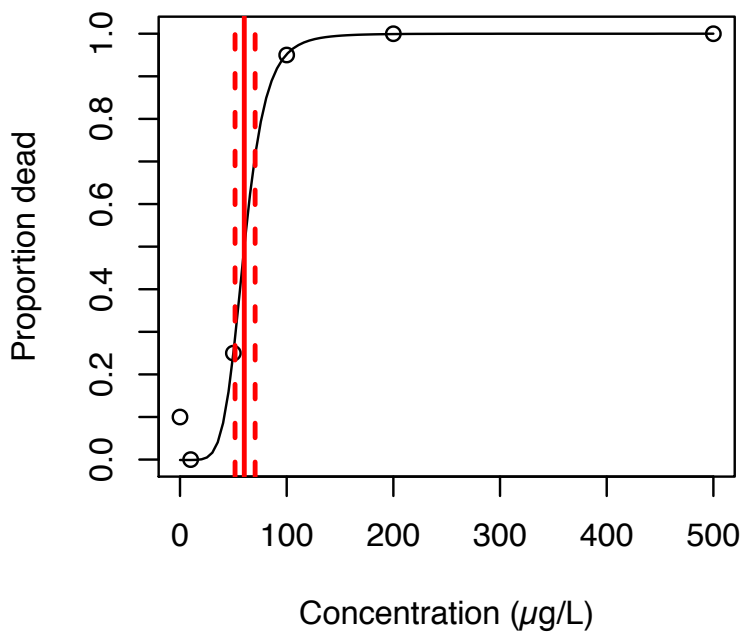

**AF. Cohort 2 (+)-Limonene  
at dose LD50 = 60  $\mu\text{L/L}$**

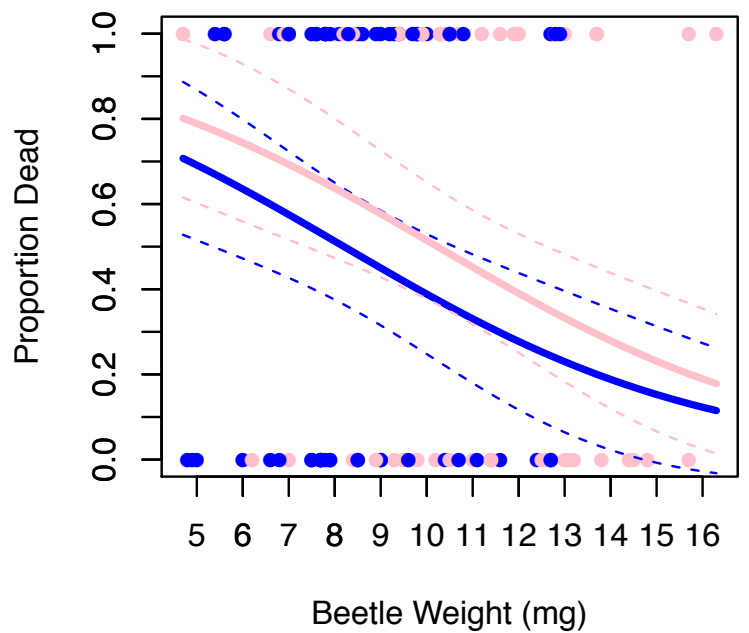

**AG. Cohort 2 Myrcene  
Concentration–Mortality Curve**

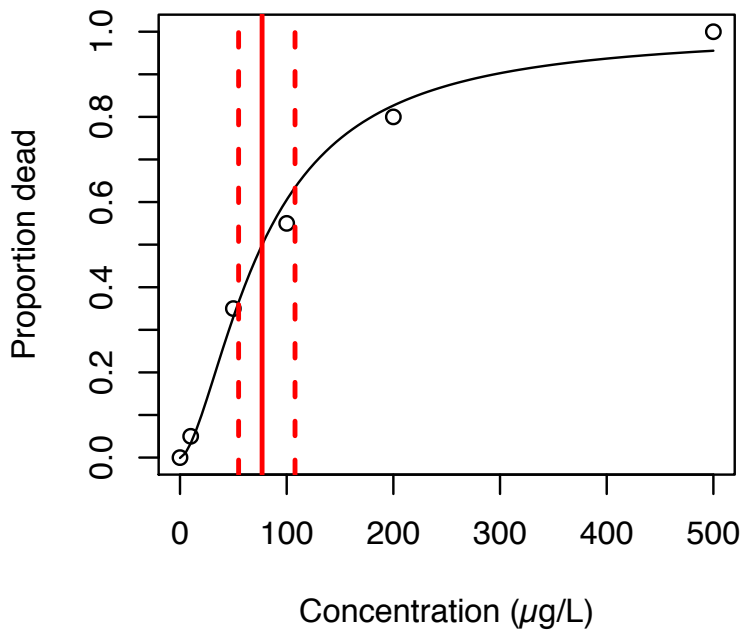

**AH. Cohort 2 Myrcene  
at dose LD50 = 77  $\mu\text{L/L}$**

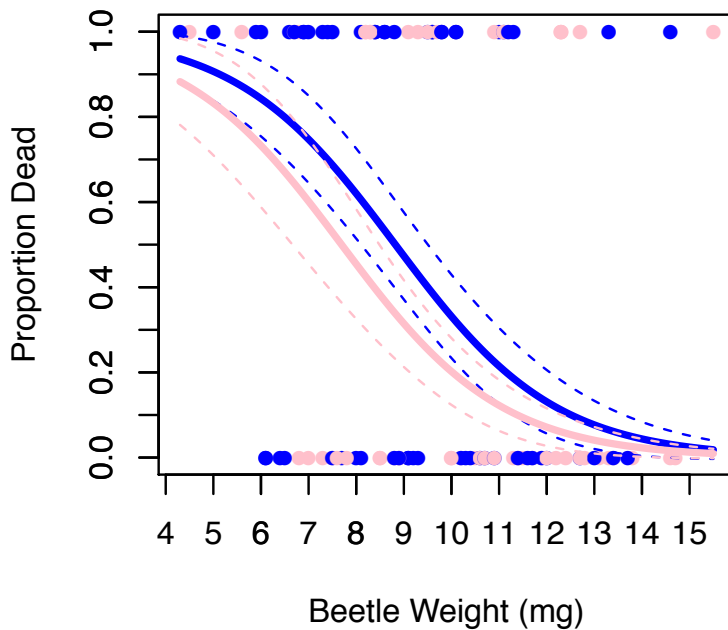

**AI. Cohort 2 Terpinolene  
Concentration–Mortality Curve**

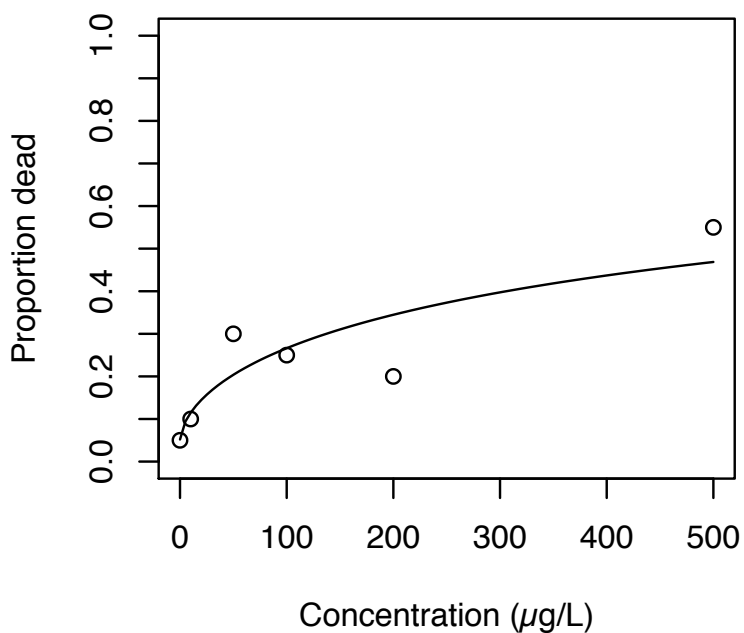

**AJ. Cohort 2 Terpinolene  
at dose LD50 = 742  $\mu\text{L/L}$**

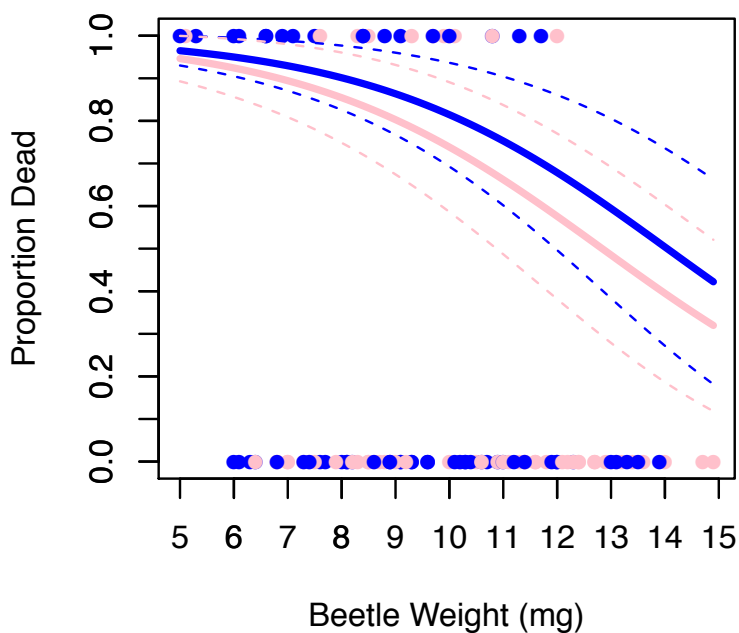

**Figure S2:** LC<sub>50</sub> and logit curves for each compound and cohort.

Subfigures A, C, E, G, I, K, M, O, Q, S, U, W, Y, AA, AC, AE, AG, and AI: Concentration-mortality curves for each compound and cohort. Dots represent the proportion of beetles dead at each concentration tested. The solid red line indicates the LC<sub>50</sub> value. Dotted red lines indicate the fiducial limits of the LC<sub>50</sub> value.

Subfigures B, D, F, H, J, L, N, P, R, T, V, X, Z, AB, AD, AF, AH, and AJ: The predicted relationship between beetle weight and mortality for each sex at the LC<sub>50</sub> value. The solid lines represent the predicted relationship between beetle weight and mortality at the LC<sub>50</sub> based on logistic regression. Lines that slope down towards the right indicate that heavier beetles survive more often. The further apart the male (blue) and female (pink) lines are, the greater the difference in mortality between the sexes, independent of weight. Dotted lines indicate the 95% confidence intervals. The dots represent each beetle tested that either survived (y=0) or died (y=1) after treatment at all doses.

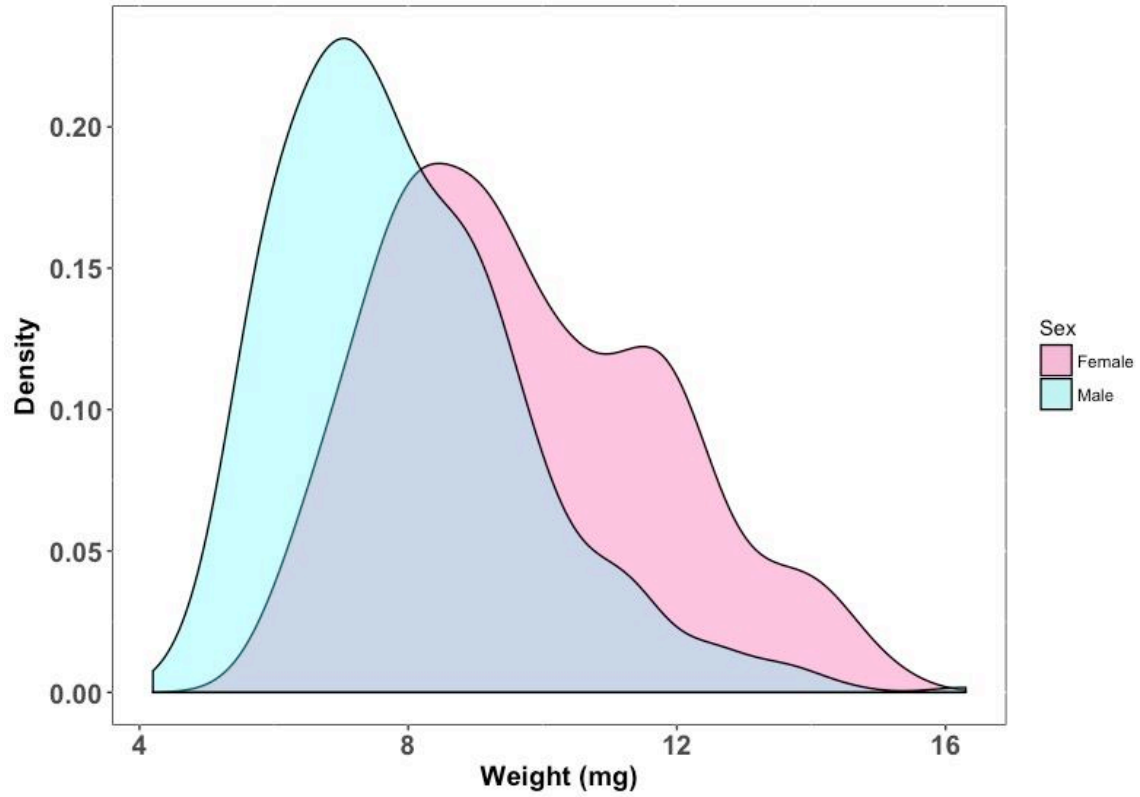

**Fig. S3** Weight distribution of MPB from cohort 1

Average weight ( $\pm$ SD) =  $8.81 \pm 2.24$  mg

Female average weight ( $\pm$ SD) =  $9.73 \pm 2.20$  mg (N=492)

Male average weight ( $\pm$ SD) =  $7.90 \pm 1.87$  mg (N=491)

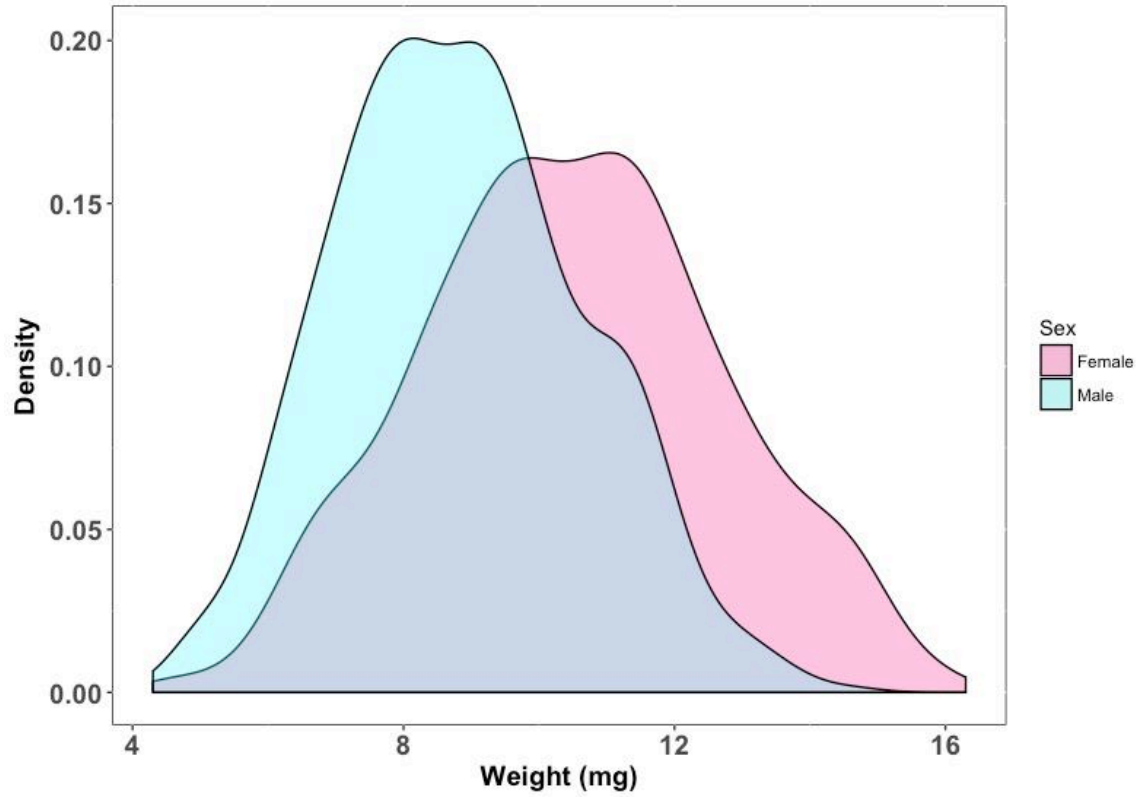

**Fig. S4** Weight distribution of MPB from cohort 2  
Average weight ( $\pm$ SD) =  $9.69 \pm 2.24$  mg  
Female average weight ( $\pm$ SD) =  $10.53 \pm 2.24$  mg (N=599)  
Male average weight ( $\pm$ SD) =  $8.85 \pm 1.90$  mg (N=600)
